# Supplementary material for: Synthesis, characterization and performance of bifunctional catalysts for the synthesis of menthol from citronellal
Source: Royal Society of Chemistry journal article supplement (doi:10.1039/c6ra25931f), 2017-01-01
Supplement: c6ra25931f1.pdf [file c6ra25931f1.pdf]

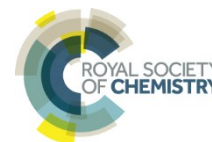

Journal Name

ARTICLE

## Synthesis, Characterization and Performance of Bifunctional Catalysts for the Synthesis of Menthol from Citronellal

J. ten Dam,<sup>a</sup> A. Ramanathan,<sup>b</sup> K. Djanashvili,<sup>a</sup> F. Kapteijn,<sup>c</sup> U. Hanefeld<sup>\*a</sup>

### Appendix A

#### Conversion to rate data

Semi-batch reactor (constant hydrogen pressure) design equation:

$$\text{A.1} \quad \frac{dc_i}{dt} = - \left( \frac{W_{cat}}{V} \right) k \cdot c_i$$

$$\text{A.2} \quad \frac{dc_i}{c_i} = - \hat{c}_{cat} \cdot k \cdot dt$$

Separation of variables and integration:

$$\text{A.3} \quad \ln \left( \frac{c_i}{c_{i0}} \right) = \ln (1 - x_i) = - \hat{c}_{cat} \cdot k \cdot t$$

$$\text{A.4} \quad \hat{c}_{cat} = \left( \frac{W_{cat}}{V} \right) [mg_{cat} mL^{-1}]$$

So for the first order rate constant, the initial rate and *TOF* we have, including dimensions:

$$\text{A.5} \quad k = - \frac{\ln (1 - x_i)}{\hat{c}_{cat} \cdot t} [mL \cdot mg_{cat}^{-1} \cdot s^{-1}]$$

$$\text{A.6} \quad r_0 = k \cdot c_{i0} [mmol \cdot mg_{cat}^{-1} \cdot s^{-1}] \text{ with } c_{i0} \text{ in } mmol \cdot mL^{-1}$$

$$\text{A.7} \quad TOF = \frac{r_0}{\hat{c}_{Pt}} [mmol \cdot mmol_{Pt}^{-1} \cdot s^{-1}] \text{ with } \hat{c}_{Pt} \text{ in } mmol_{Pt} \cdot mg_{cat}^{-1}$$

Where:

$c_i$  concentration of component  $i$  [ $mmol \cdot mL^{-1}$ ]

$c_{i0}$  concentration of component  $i$  at  $t = 0$  [ $mmol \cdot mL^{-1}$ ]

$W_{cat}$  catalyst mass [ $mg$ ]

$V$  reaction volume [ $mL$ ]

$\hat{c}_{cat}$  catalyst on basis of concentration [ $mg_{cat} mL^{-1}$ ]

|                |                                                                                 |
|----------------|---------------------------------------------------------------------------------|
| $k$            | rate constant [ $mL \cdot mg_{cat}^{-1} \cdot s^{-1}$ ]                         |
| $t$            | time [s]                                                                        |
| $x_i$          | conversion of component $i$ [-]                                                 |
| $r_0$          | initial rate [ $mmol \cdot mg_{cat}^{-1} \cdot s^{-1}$ ]                        |
| $TOF$          | turnover frequency [ $mmol \cdot mmol_{Pt}^{-1} \cdot s^{-1}$ ]                 |
| $\hat{c}_{Pt}$ | catalyst on basis of platinum concentration [ $mmol_{Pt} \cdot mg_{cat}^{-1}$ ] |

## Appendix B

## Mass transfer considerations utilising Carberry numbers and WW-criteria

## Carberry number

The Carberry number is used to estimate extraparticle mass transfer, which can be neglected when  $Ca < 0.05$ .

$$Ca = \frac{r_{v,obs}}{a k_f c_b} < \frac{0.05}{|n|}$$

Where:

- $Ca$  Carberry number [ - ]  
 $r_{v,obs}$  observed reaction rate per unit particle volume [ $mol \cdot s^{-1} \cdot m_p^{-3}$ ]  
 $a$  specific external surface of the catalyst particle ( $a = 6/d_p$ ) [ $m^2 \cdot m^{-3}$ ]  
 $k_f$  mass transfer coefficient ( $k_f = Sh \cdot D/d_p$ ) [ $m \cdot s^{-1}$ ]  
 $c_b$  concentration in the bulk [ $mol \cdot m^{-3}$ ]  
 $n$  reaction order [ - ] – in these examples  $n = 1$   
 $d_p$  particle diameter [ $m$ ] – in these examples  $d_p = 200 \mu m$   
 $Sh$  Sherwood correlation [ $m$ ] – in these examples  $Sh = 2$ , which is valid for a sphere in a stagnant fluid  
 $D$  diffusion coefficient of the reactant in the liquid phase ( $D = D_{eff}/\sim 0.1$ ) [ $m^2 \cdot s^{-1}$ ] –  $D$  was taken from the thesis of Martijn Zieverink:  $D = 1.8 \cdot 10^{-9}$  for the substrates and  $D = 1.8 \cdot 10^{-8}$  for hydrogen

## Weisz criterion

The Weisz modulus is used to estimate the influence of pore diffusion on reaction rates in heterogeneously catalysed reactions. pore diffusion limitations are insignificant if the modulus satisfies the criterion.

$$M_W = \eta \varphi^2 = \left( \frac{r_{v,obs} L^2}{D_{eff} c_s} \right) \left( \frac{n+1}{2} \right) < 0.15$$

Where:

- $M_W$  Weisz Modulus  
 $\varphi$  Thiele modulus:  $\varphi = L \sqrt{k_v/D_{eff}}$   
 $k_v$  rate constant per unit volume [ $s^{-1}$ ]  
 $\eta$  effectiveness factor  
 $D_{eff}$  effective diffusivity in particle [ $m^2 \cdot s^{-1}$ ] –  $D_{eff}$  was taken from the thesis of Martijn Zieverink:  $D_{eff} = 1.8 \cdot 10^{-10}$  for the substrates and  $D = 1.8 \cdot 10^{-9}$  for hydrogen  
 $r_{v,obs}$  observed reaction rate per unit particle volume [ $mol \cdot s^{-1} \cdot m_p^{-3}$ ]  
 $L$  characteristic catalyst dimension  $L = d_p/6$  [ $m$ ]  
 $c_s$  concentration at the external particle surface [ $mol \cdot m^{-3}$ ]  
 $n$  reaction order [ - ] – in these examples  $n = 1$   
 $d_p$  particle diameter [ $m$ ] – in these examples  $d_p = 200 \mu m$

**Table A1.** Carberry numbers and WW-criteria for catalytic data Table 2 – isopulegol hydrogenation

|                            | concentration bulk                            |                                        | rate constant                                    | initial rate                                         | observed reaction rate                               | Carberry number        |                 | WW-criterion             |                   |
|----------------------------|-----------------------------------------------|----------------------------------------|--------------------------------------------------|------------------------------------------------------|------------------------------------------------------|------------------------|-----------------|--------------------------|-------------------|
|                            | $C_{b, isopulegol}$<br>( $mol \cdot m^{-3}$ ) | $C_{b, H_2}$<br>( $mol \cdot m^{-3}$ ) | $k$<br>( $mL \cdot mg_{cat}^{-1} \cdot s^{-1}$ ) | $r_o$<br>( $mmol \cdot mg_{cat}^{-1} \cdot s^{-1}$ ) | $r_{v,obs}$<br>( $mol \cdot s^{-1} \cdot m_p^{-3}$ ) | $Ca_{isopulegol}$<br>- | $Ca_{H_2}$<br>- | $\Phi_{isopulegol}$<br>- | $\Phi_{H_2}$<br>- |
| Pt/W-TUD-1 <sub>28</sub>   | 509.1                                         | 92.9                                   | 4.1E-06                                          | 2.1E-06                                              | 2.07                                                 | 7.5E-03                | 4.0E-03         | 2.5E-02                  | 1.4E-02           |
| Pt/W-TUD-1 <sub>16</sub>   | 518.2                                         | 92.9                                   | 9.3E-08                                          | 4.8E-08                                              | 0.05                                                 | 1.7E-04                | 9.6E-05         | 5.7E-04                  | 3.2E-04           |
| Pt/W-TUD-1 <sub>11</sub>   | 532.1                                         | 92.9                                   | 5.3E-07                                          | 2.8E-07                                              | 0.28                                                 | 9.9E-04                | 5.7E-04         | 3.3E-03                  | 1.9E-03           |
| Pt/W-TUD-1 <sub>9</sub>    | 507.8                                         | 92.9                                   | 2.3E-06                                          | 1.2E-06                                              | 1.18                                                 | 4.3E-03                | 2.3E-03         | 1.4E-02                  | 7.8E-03           |
| Pt/W-TUD-1 <sub>7</sub>    | 497.4                                         | 92.9                                   | 8.6E-07                                          | 4.3E-07                                              | 0.43                                                 | 1.6E-03                | 8.6E-04         | 5.3E-03                  | 2.9E-03           |
| Pt/WO3/TUD-1 <sub>5</sub>  | 508.4                                         | 92.9                                   | 2.4E-07                                          | 1.2E-07                                              | 0.12                                                 | 4.4E-04                | 2.4E-04         | 1.5E-03                  | 8.0E-04           |
| Pt/WO3/TUD-1 <sub>10</sub> | 508.6                                         | 92.9                                   | 2.0E-07                                          | 1.0E-07                                              | 0.10                                                 | 3.8E-04                | 2.1E-04         | 1.3E-03                  | 6.8E-04           |
| Pt/WO3/TUD-1 <sub>20</sub> | 490.6                                         | 92.9                                   | 3.6E-07                                          | 1.8E-07                                              | 0.18                                                 | 6.7E-04                | 3.5E-04         | 2.2E-03                  | 1.2E-03           |

**Table A2.** Carberry numbers and WW-criteria for catalytic data figure 8 – isopulegol hydrogenation

|                          | concentration bulk                                   |                                               | rate constant                                                 | initial rate                                                      | observed reaction rate                                                      | Carberry number               |                        | WW-criterion                    |                          |
|--------------------------|------------------------------------------------------|-----------------------------------------------|---------------------------------------------------------------|-------------------------------------------------------------------|-----------------------------------------------------------------------------|-------------------------------|------------------------|---------------------------------|--------------------------|
|                          | $C_{b, \text{isopulegol}}$<br>(mol·m <sup>-3</sup> ) | $C_{b, \text{H}_2}$<br>(mol·m <sup>-3</sup> ) | $k$<br>(mL·mg <sub>cat</sub> <sup>-1</sup> ·s <sup>-1</sup> ) | $r_o$<br>(mmol·mg <sub>cat</sub> <sup>-1</sup> ·s <sup>-1</sup> ) | $r_{v, \text{obs}}$<br>(mol·s <sup>-1</sup> ·m <sub>p</sub> <sup>-3</sup> ) | $Ca_{\text{isopulegol}}$<br>- | $Ca_{\text{H}_2}$<br>- | $\Phi_{\text{isopulegol}}$<br>- | $\Phi_{\text{H}_2}$<br>- |
| Pt/W-TUD-1 <sub>11</sub> | 466.6                                                | 92.9                                          | 4.3E-06                                                       | 2.0E-06                                                           | 1.99                                                                        | 7.9E-03                       | 4.0E-03                | 2.6E-02                         | 1.3E-02                  |

**Table A3.** Carberry numbers and WW-criteria for catalytic data table 4 – Prins cyclisation

|                            | concentration bulk                                 |  | rate constant                                                 | initial rate                                                    | observed reaction rate                                                      | Carberry number                | WW-criterion                     |
|----------------------------|----------------------------------------------------|--|---------------------------------------------------------------|-----------------------------------------------------------------|-----------------------------------------------------------------------------|--------------------------------|----------------------------------|
|                            | $C_{b, \text{citronellal}}$<br>mol·m <sup>-3</sup> |  | $k$<br>(mL·mg <sub>cat</sub> <sup>-1</sup> ·s <sup>-1</sup> ) | $r$<br>(mmol·mg <sub>cat</sub> <sup>-1</sup> ·s <sup>-1</sup> ) | $r_{v, \text{obs}}$<br>(mol·s <sup>-1</sup> ·m <sub>p</sub> <sup>-3</sup> ) | $Ca_{\text{citronellal}}$<br>- | $\Phi_{\text{citronellal}}$<br>- |
| Pt/W-TUD-1 <sub>28</sub>   | 468.7                                              |  | 8.4E-06                                                       | 4.0E-06                                                         | 3.95                                                                        | 1.6E-02                        | 5.2E-02                          |
| Pt/W-TUD-1 <sub>16</sub>   | 515.1                                              |  | 1.0E-05                                                       | 5.2E-06                                                         | 5.18                                                                        | 1.9E-02                        | 6.2E-02                          |
| Pt/W-TUD-1 <sub>11</sub>   | 525.0                                              |  | 2.3E-05                                                       | 1.2E-05                                                         | 11.98                                                                       | <b>4.2E-02</b>                 | <b>1.4E-01</b>                   |
| Pt/W-TUD-1 <sub>9</sub>    | 493.0                                              |  | 1.2E-05                                                       | 5.9E-06                                                         | 5.92                                                                        | 2.2E-02                        | 7.4E-02                          |
| Pt/W-TUD-1 <sub>7</sub>    | 516.2                                              |  | 1.2E-05                                                       | 6.0E-06                                                         | 5.95                                                                        | 2.1E-02                        | 7.1E-02                          |
| Pt/WO3/TUD-1 <sub>5</sub>  | 497.2                                              |  | 1.6E-06                                                       | 7.9E-07                                                         | 0.79                                                                        | 2.9E-03                        | 9.8E-03                          |
| Pt/WO3/TUD-1 <sub>10</sub> | 527.1                                              |  | 1.3E-06                                                       | 6.6E-07                                                         | 0.66                                                                        | 2.3E-03                        | 7.8E-03                          |
| Pt/WO3/TUD-1 <sub>20</sub> | 511.5                                              |  | 1.2E-06                                                       | 6.1E-07                                                         | 0.61                                                                        | 2.2E-03                        | 7.3E-03                          |

**Table A4.** Carberry numbers and WW-criteria for catalytic data table 4 - hydrogenation

|                            | concentration bulk                                   |                                               | rate constant                                                 | initial rate                                                    | observed reaction rate                                                      | Carberry number               |                        | WW-criterion                    |                          |
|----------------------------|------------------------------------------------------|-----------------------------------------------|---------------------------------------------------------------|-----------------------------------------------------------------|-----------------------------------------------------------------------------|-------------------------------|------------------------|---------------------------------|--------------------------|
|                            | $C_{b, \text{isopulegol}}$<br>(mol·m <sup>-3</sup> ) | $C_{b, \text{H}_2}$<br>(mol·m <sup>-3</sup> ) | $k$<br>(mL·mg <sub>cat</sub> <sup>-1</sup> ·s <sup>-1</sup> ) | $r$<br>(mmol·mg <sub>cat</sub> <sup>-1</sup> ·s <sup>-1</sup> ) | $r_{v, \text{obs}}$<br>(mol·s <sup>-1</sup> ·m <sub>p</sub> <sup>-3</sup> ) | $Ca_{\text{isopulegol}}$<br>- | $Ca_{\text{H}_2}$<br>- | $\Phi_{\text{isopulegol}}$<br>- | $\Phi_{\text{H}_2}$<br>- |
| Pt/W-TUD-1 <sub>28</sub>   | 399.3                                                | 92.9                                          | 5.3E-06                                                       | 2.1E-06                                                         | 2.10                                                                        | 9.7E-03                       | 4.2E-03                | 3.2E-02                         | 1.4E-02                  |
| Pt/W-TUD-1 <sub>16</sub>   | 466.8                                                | 92.9                                          | 2.2E-06                                                       | 1.0E-06                                                         | 1.04                                                                        | 4.1E-03                       | 2.1E-03                | 1.4E-02                         | 6.9E-03                  |
| Pt/W-TUD-1 <sub>11</sub>   | 522.5                                                | 92.9                                          | 4.6E-06                                                       | 2.4E-06                                                         | 2.41                                                                        | 8.5E-03                       | 4.8E-03                | 2.8E-02                         | 1.6E-02                  |
| Pt/W-TUD-1 <sub>9</sub>    | 461.4                                                | 92.9                                          | 4.9E-06                                                       | 2.2E-06                                                         | 2.25                                                                        | 9.0E-03                       | 4.5E-03                | 3.0E-02                         | 1.5E-02                  |
| Pt/W-TUD-1 <sub>7</sub>    | 482.4                                                | 92.9                                          | 5.0E-06                                                       | 2.4E-06                                                         | 2.41                                                                        | 9.3E-03                       | 4.8E-03                | 3.1E-02                         | 1.6E-02                  |
| Pt/WO3/TUD-1 <sub>5</sub>  | 152.3                                                | 92.9                                          | 5.9E-07                                                       | 2.1E-07                                                         | 0.21                                                                        | 2.5E-03                       | 4.1E-04                | 8.3E-03                         | 1.4E-03                  |
| Pt/WO3/TUD-1 <sub>10</sub> | 129.1                                                | 92.9                                          | 7.7E-07                                                       | 2.9E-07                                                         | 0.29                                                                        | 4.1E-03                       | 5.8E-04                | 1.4E-02                         | 1.9E-03                  |
| Pt/WO3/TUD-1 <sub>20</sub> | 122.6                                                | 92.9                                          | 1.0E-06                                                       | 4.0E-07                                                         | 0.40                                                                        | 6.0E-03                       | 7.9E-04                | 2.0E-02                         | 2.6E-03                  |

**Table A5.** Carberry numbers and WW-criteria for catalytic data table 5 – Prins cyclisation

|                            | concentration bulk                                 |  | rate constant                                                 | initial rate                                                    | observed reaction rate                                                      | Carberry number                | WW-criterion                     |
|----------------------------|----------------------------------------------------|--|---------------------------------------------------------------|-----------------------------------------------------------------|-----------------------------------------------------------------------------|--------------------------------|----------------------------------|
|                            | $C_{b, \text{citronellal}}$<br>mol·m <sup>-3</sup> |  | $k$<br>(mL·mg <sub>cat</sub> <sup>-1</sup> ·s <sup>-1</sup> ) | $r$<br>(mmol·mg <sub>cat</sub> <sup>-1</sup> ·s <sup>-1</sup> ) | $r_{v, \text{obs}}$<br>(mol·s <sup>-1</sup> ·m <sub>p</sub> <sup>-3</sup> ) | $Ca_{\text{citronellal}}$<br>- | $\Phi_{\text{citronellal}}$<br>- |
| Pt/W-TUD-1 <sub>28</sub>   | 694.0                                              |  | 5.9E-07                                                       | 4.1E-07                                                         | 0.41                                                                        | 1.1E-03                        | 3.6E-03                          |
| Pt/W-TUD-1 <sub>16</sub>   | 576.8                                              |  | 8.6E-07                                                       | 5.0E-07                                                         | 0.50                                                                        | 1.6E-03                        | 5.3E-03                          |
| Pt/W-TUD-1 <sub>11</sub>   | 551.8                                              |  | 6.7E-07                                                       | 3.7E-07                                                         | 0.37                                                                        | 1.2E-03                        | 4.2E-03                          |
| Pt/W-TUD-1 <sub>9</sub>    | -                                                  |  | -                                                             | -                                                               | -                                                                           | -                              | -                                |
| Pt/W-TUD-1 <sub>7</sub>    | 551.1                                              |  | 1.7E-07                                                       | 9.4E-08                                                         | 0.09                                                                        | 3.2E-04                        | 1.1E-03                          |
| Pt/WO3/TUD-1 <sub>5</sub>  | 553.6                                              |  | 1.9E-07                                                       | 1.0E-07                                                         | 0.10                                                                        | 3.5E-04                        | 1.2E-03                          |
| Pt/WO3/TUD-1 <sub>10</sub> | 523.1                                              |  | 1.8E-07                                                       | 9.4E-08                                                         | 0.09                                                                        | 3.3E-04                        | 1.1E-03                          |
| Pt/WO3/TUD-1 <sub>20</sub> | 532.0                                              |  | 1.9E-07                                                       | 1.0E-07                                                         | 0.10                                                                        | 3.6E-04                        | 1.2E-03                          |

**Table A6.** Carberry numbers and WW-criteria for catalytic data table 5 - hydrogenation

|                            | concentration bulk                                   |                                               | rate constant                                                 | initial rate                                                    | observed reaction rate                                                      | Carberry number               |                        | WW-criterion                    |                          |
|----------------------------|------------------------------------------------------|-----------------------------------------------|---------------------------------------------------------------|-----------------------------------------------------------------|-----------------------------------------------------------------------------|-------------------------------|------------------------|---------------------------------|--------------------------|
|                            | $C_{b, \text{isopulegol}}$<br>(mol·m <sup>-3</sup> ) | $C_{b, \text{H}_2}$<br>(mol·m <sup>-3</sup> ) | $k$<br>(mL·mg <sub>cat</sub> <sup>-1</sup> ·s <sup>-1</sup> ) | $r$<br>(mmol·mg <sub>cat</sub> <sup>-1</sup> ·s <sup>-1</sup> ) | $r_{v, \text{obs}}$<br>(mol·s <sup>-1</sup> ·m <sub>p</sub> <sup>-3</sup> ) | $Ca_{\text{isopulegol}}$<br>- | $Ca_{\text{H}_2}$<br>- | $\Phi_{\text{isopulegol}}$<br>- | $\Phi_{\text{H}_2}$<br>- |
| Pt/W-TUD-1 <sub>28</sub>   | 562.2                                                | 92.9                                          | 8.8E-07                                                       | 5.0E-07                                                         | 0.50                                                                        | 1.6E-03                       | 9.9E-04                | 5.4E-03                         | 3.3E-03                  |
| Pt/W-TUD-1 <sub>16</sub>   | 455.5                                                | 92.9                                          | 5.3E-07                                                       | 2.4E-07                                                         | 0.24                                                                        | 9.7E-04                       | 4.8E-04                | 3.2E-03                         | 1.6E-03                  |
| Pt/W-TUD-1 <sub>11</sub>   | 462.3                                                | 92.9                                          | 1.0E-06                                                       | 4.8E-07                                                         | 0.48                                                                        | 1.9E-03                       | 9.6E-04                | 6.4E-03                         | 3.2E-03                  |
| Pt/W-TUD-1 <sub>9</sub>    |                                                      |                                               |                                                               |                                                                 |                                                                             |                               |                        |                                 |                          |
| Pt/W-TUD-1 <sub>7</sub>    | 485.4                                                | 92.9                                          | 4.5E-05                                                       | 2.2E-05                                                         | 21.93                                                                       | <b>8.4E-02</b>                | <b>4.4E-02</b>         | <b>2.8E-01</b>                  | <b>1.5E-01</b>           |
| Pt/WO3/TUD-1 <sub>5</sub>  | 532.9                                                | 92.9                                          | 1.3E-07                                                       | 6.8E-08                                                         | 0.07                                                                        | 2.4E-04                       | 1.4E-04                | 7.9E-04                         | 4.5E-04                  |
| Pt/WO3/TUD-1 <sub>10</sub> | 497.8                                                | 92.9                                          | 5.1E-07                                                       | 2.5E-07                                                         | 0.25                                                                        | 9.4E-04                       | 5.0E-04                | 3.1E-03                         | 1.7E-03                  |
| Pt/WO3/TUD-1 <sub>20</sub> | 528.3                                                | 92.9                                          | 7.2E-07                                                       | 3.8E-07                                                         | 0.38                                                                        | 1.3E-03                       | 7.5E-04                | 4.4E-03                         | 2.5E-03                  |

## Reference

Martijn Zieverink, 2006, "A catalysis engineering approach to selective hydrogenation", TU Delft, Delft, pp 1-166.
